voraus. Die Dauer der Wucherung wechselt in den verschiedenen Jahren mit der Lichtmenge.

Die Arbeit stellt einen sehr interessanten Versuch dar, die Planktonproduktion an einer Stelle im Kreislauf des Jahres unter Berücksichtigung aller erkennbarer Faktoren quantitativ darzustellen. Unter den vielen Schwierigkeiten dieser Aufgabe erscheint als die grösste die, dass der Gehalt des Wassers an gelösten organischen Substanzen bisher nicht bestimmbar ist.

*E. H.*

**P. Jespersen.** "Quantitative Investigations on the Distribution of the Macroplankton in Different Oceanic Regions." Dana-Report No. 7. Copenhagen, 1935.

Diese Arbeit erstreckt sich auf Meeresgebiete von so grosser Ausdehnung, wie sie noch keine andere allgemeine Untersuchung über das Plankton umfasst hat. Mehr als 2000 Fänge der "Dana"-Expeditionen, ausgeführt mit Stramnetzen von  $1\frac{1}{2}$ —2 m. Durchmesser, werden in bezug auf das Volumen des Macroplanktons ausgewertet. Stets wurde die Zahl in ccm. für einen einstündigen horizontalen Fang berechnet, sodass lange Reihen von Fängen längs der Fahrtlinien oder für bestimmte Ausschnitte des Ozeans und für die verschiedensten Leinenlängen von 50—5000 m. miteinander quantitativ vergleichbar werden. Die Ergebnisse lassen überall deutlich die grossen Grundzüge der Dichteverteilung des Planktons erkennen, die bisher mit anderen Methoden nur bruchstückweise festgestellt worden sind.

Drei Profile über den Atlantischen Ozean zwischen  $10^{\circ}$  und  $50^{\circ}$  N.Br. (50—300 m. Drahtlänge) zeigen die Planktonarmut der Sargassosee, ein schwaches Ansteigen nach dem Caribischen Meer zu, stärkeres unmittelbar an der amerikanischen Küste, sehr starkes auf breiter Fläche an der Ostseite des Ozeans. Fänge bei Island und Grönland mit 1000 bis 4000 m. Drahtlänge zeigen Zunahme von Süden nach Norden. Fänge mit dem kleineren Netz zwischen etwa  $8^{\circ}$  und  $55^{\circ}$  N.Br. aus gleichen Tiefen erweisen im Norden dieselbe Zunahme, ferner Reichtum im Canarisch-Capverdischen Gebiet, äusserste Armut der westlichen Sargassosee. Die Fänge aus dem Stillen Ozean zwischen Panama und Australien (50—100 m. Drahtlänge) zeigen Reichtum des Planktons im Osten bis zu den Marquesas, hauptsächlich westlich der Galapagos, Armut südlich von Samoa zwischen Fijinseln und Tahiti, weiterhin Zunahme gegen Australien und Reichtum bei Neuseeland. Ein Schnitt von Panama nach Neuseeland ähnelt infolgedessen den atlantischen Querschnitten. Im Einzelnen ist hervorzuheben, dass im Golf von Panama das Plankton unter 1000 m. viel reicher ist als über 1000 m., dass zuweilen, (doch nicht immer) Planktonreichtum und Reichtum an Phosphat und Nitrat zusammentrifft, dass im Westen die Temperatur sowohl durch ihre nordsüdliche Abnahme wie ihre ostwestliche Zunahme zwischen Neuseeland und dem Festlande Einfluss auf die Planktonmenge hat, und dass der Reichtum bei Neuseeland auf Zustrom antarktischen Wassers beruht. Die Anzahl der Fische in den Fängen des Stillen Ozeans zeigt in allen Abschnitten ein Minimum bei 1000 m. Drahtlänge, Maxima bei 50—300 und 2000 m. Das Minimum bei 1000 m. Drahtlänge ist auch im Planktonvolumen nachweisbar. Das Maximum bei 2000 m. (= 1000 m. Tiefe etwa) trifft mit dem Kern des "Subantarktischen Zwischenstroms" zusammen. Die Planktonvolumina des indo-malayischen Gebiets lassen trotz der Tropenlage jahreszeitliche Veränderungen erkennen. Westlich von Sumatra wurden so zahlreiche Fänge aus 200—350 m. Tiefe gemacht, dass Mittelwerte für 44 Eingradfelder berechnet werden konnten.

Im Indischen Ozean nimmt auf der Strecke Sumatra—Ceylon—Madagaskar—Mombasa das Plankton bis Madagaskar stetig zu, hauptsächlich durch Salpen bedingt, wird dann aber sehr gering, wie auch auf der ganzen Strecke Mombasa—Kapstadt. Die Strecke Kapstadt—Gibraltar zeigt bis St. Helena geringe Planktonmengen, danach starke, voneinander scharf getrennte Maxima, meist von Salpen gebildet, die deutlich den "Zungen" der "Meteor"-Expedition entsprechen. Ein reiches Material von der Gibraltarstrasse offenbart jahreszeitliche Unterschiede. Die meist vorherrschenden Salpen zeigen tageszeitlich gleichmässige Verteilung, Siphonophoren und Euphausiden dagegen nächtliches Aufsteigen. Im Mittelmeer nimmt das Plankton von Westen nach Osten ab, scheinbar in Korrelation mit dem Nitratgehalt. Ein Vergleich des Caribischen Meeres mit dem Golf von Panama ergibt für die oberen Wasserschichten reicheres Plankton im Westen, für die tieferen im Osten der Landenge und zwar bei 1000—3000 m. Drahtlänge das 6—8 fache. Nur hier unter allen befahrenen Strecken gibt es ein Überwiegen des Tiefenplanktons über das der obersten Wasserschichten. Zum Schluss wird eine graphische Gesamtübersicht gegeben.

Im Bereiche der geographisch gerichteten Planktonforschung nimmt diese Arbeit eine einzigartige Stellung ein, nicht nur durch die gewaltige Ausdehnung der untersuchten Meeresgebiete, sondern besonders dadurch, dass sie trotz der Einfachheit ihrer Methodik die grossen geographischen Verhältnisse der Planktonverteilung im Ozean, die auf anderen Wegen nur mit grosser Mühe festzustellen sind, augenscheinlich quantitativ richtig zur Darstellung bringt. Sie ist so rein quantitativ, dass lateinische Artnamen überhaupt nicht, auch Gattungsnamen so gut wie garnicht vorkommen.

E. H.

**W. E. Frost.** "Larval Stages of the Euphausiids *Nematoscelis megalops* (G. O. Sars) and *Stylocheiron longicorne* (G. O. Sars) taken off the South-West Coast of Ireland." Proc. Roy. Irish Acad. Vol. XLII, Sect. B, No. 16. Dublin, 1935.

Miss Frost adds two more larval histories to the series of euphausiids which she has investigated during the last few years. Both come from the deep water off the south-west of Ireland where the adults have already been recorded by Holt and Tattersall. The material was collected during the scientific cruises of the S. S. "Muirchu," the vessel of the Irish Free State Fisheries Department. The area investigated lies off the south and south-west coast of Ireland and extends from 51° 40' N. in the north to 49° 20' N. in the south, and 6° 21' W. in the east to 13° 00' W. in the west. A list of stations (19 in all) where the larvae were taken is given. The work is illustrated by four plates of clear line-drawings.

Neither of these larval histories was previously known, although those of *Nematoscelis microps*, *Stylocheiron submii* and *S. abbreviatum* have been described from the Mediterranean in the neighbourhood of Alexandria, where the waters although much shallower were of comparatively high salinity and temperature corresponding to the oceanic conditions of the Irish Sea. It is interesting to find that in all these species and in *Euphausia krohnii* and *Thysanopoda aequalis* previously described there is an abbreviation in the number of larval furcilia stages, showing a distinct shortening of the life history compared with the long series of larvae in those from the more neritic waters — *Nyctiphanes*, *Meganyciphanes*, and *Thysanoessa*.
